# Supplementary material
Source: publisher figshare collection journal article supplement (https://frontiersin.figshare.com/ndownloader/files/15220214)
Supplement: Supplementary file 1 [file 15220214]

**Supplementary Data Sheet S1.** Idaho and Washington data collection sheet observation codes and definitions, 2016–2017.

**Idaho/Washington Milkweed & Monarch Observation Codes and Definitions**

**WEATHER DATA**

**Temp:** record in ° F

**Wind speed:** use Beaufort scale

| Wind Speed Codes |          |                                                                |
|------------------|----------|----------------------------------------------------------------|
| Beaufort         | MPH      | Indicators                                                     |
| 0                | <1       | smoke rises vertically                                         |
| 1                | 1 to 3   | wind direction shown by smoke drift                            |
| 2                | 4 to 7   | wind felt on face; leaves rustle                               |
| 3                | 8 to 12  | leaves, twigs in constant motion                               |
| 4                | 13 to 18 | dust, leaves, and loose paper lifted; small tree branches move |
| 5                | 19 to 24 | small trees in leaf begin to sway                              |

**% Cloud cover:** Measured in tenths of the sky; choose one: 0, 10, 20, 30, 40, 50, 60, 70, 80, 90, 100

**Precipitation:** Choose one: None, Trace, Light, Moderate, Heavy

**Appropriate weather:** Temperature  $\geq 70^{\circ}$  F, wind  $\leq 10$ -15 mph, distinct shadows cast by sunlight (Y/N)

**MILKWEED DATA**

**Milkweed species:** Use abbreviation

| Code | Scientific name                  | Common name            |
|------|----------------------------------|------------------------|
| ASAS | <i>Asclepias asperula</i>        | Antelope horns         |
| ASCR | <i>Asclepias cryptoceras</i>     | Pallid milkweed        |
| ASFA | <i>Asclepias fascicularis</i>    | Narrow-leafed milkweed |
| ASIN | <i>Asclepias incarnata</i>       | Swamp milkweed         |
| ASSP | <i>Asclepias speciosa</i>        | Showy milkweed         |
| ASSU | <i>Asclepias subverticillata</i> | Poison milkweed        |

**Milkweed patch structure:** The spatial arrangement of the milkweed plants within the landscape. Choose one:

| Code | Milkweed structure | Definition                                                                                                                                                                                                                                                                                                                                                                                                       |
|------|--------------------|------------------------------------------------------------------------------------------------------------------------------------------------------------------------------------------------------------------------------------------------------------------------------------------------------------------------------------------------------------------------------------------------------------------|
| L    | Linear             | Close to loosely-spaced grouping of plants, much longer than wide, whose spatial extent cannot be readily delineated by a single GPS point or patch size; plants may be continuously or discontinuously distributed; occur along road margins, fence lines, or other discreet habitat edges that limit population expansion in 1 or more directions. Coordinates should be approximately mid-line when feasible. |
| N    | Nonlinear          | Single plants or closely-spaced groups which can be readily delineated by a single GPS point and/or discernable patch size. Also includes patches distributed somewhat continuously throughout a habitat or field within sight distance from each other.                                                                                                                                                         |

**Patch:** A discrete grouping of milkweed plants; separated from other milkweed patches by  $\geq 25$ –50 m (82–164 ft), or dense, tall shrubs and/or trees, buildings, roads, etc.

**Patch size:** Patch size of milkweed delineated by GPS coordinates, rangefinder, or optical estimate, reported in square meters (length x width).

**Plant count:** Complete count or estimated number of plants (or stems) in the patch designated by the GPS Coordinates. For large, continuous patches, sub-sampling of a smaller, representative patch is appropriate for estimating the plant count. Plant count includes all milkweed stems, including unbranched and multi-branched plants.

**Plant count method:** This field is to enter how you derived your plant count and percentages for the stages of phenology – vegetative, flowering, pods. Choose one:

| Code  | Plant count method        | Definition                                                                                           |
|-------|---------------------------|------------------------------------------------------------------------------------------------------|
| CP/SC | Complete plant/stem count | all visible unbranched and multi-branched plants were counted within the area designated as the site |
| OE    | Optical Estimation        | count and percentages estimated                                                                      |
| SM    | Standardized Methodology  | counts and percentages derived from accepted and documented subsampling methods                      |
| OM    | Other Methods             |                                                                                                      |

**Percent vegetative plants:** Percent of plants without buds, flowers, or pods

Choose one: 0%, 10%, 25%, 50%, 75%, 100%

**Percent flowering plants:** Percent of plants with buds and/or open flowers

Choose one: 0%, 10%, 25%, 50%, 75%, 100%

**Percent plants with pods:** Percent of plants with pods (includes young to mature pods)

Choose one: 0%, 10%, 25%, 50%, 75%, 100%

**Average height of plants:** Average height of plants in the patch in inches

**Larvae herbivory:** Plants show evidence of herbivory from caterpillars

Choose one: Yes, No, or Not Checked

All three  
responses  
should  
add to  
100%

**Habitat type:** General habitat type that the milkweed occurs in. Multi-select if appropriate (separate by

| <b>Code</b> | <b>Habitat type</b> | <b>Habitat description</b>                                                                                                                                                                                                                                                                         |
|-------------|---------------------|----------------------------------------------------------------------------------------------------------------------------------------------------------------------------------------------------------------------------------------------------------------------------------------------------|
| <b>CC</b>   | Cultivated Crops    | Areas used for the production of annual crops, such as corn, soybeans, vegetables, tobacco, and cotton, and also perennial woody crops such as orchards and vineyards. Crop vegetation accounts for greater than 20% of total vegetation. This class also includes all land being actively tilled. |
| <b>DF</b>   | Deciduous Forest    | Areas dominated by trees generally >5 meters tall, and >20% of total vegetation cover. More than 75% of tree species shed foliage simultaneously in response to seasonal change.                                                                                                                   |

commas in field data sheet); for Cultivate Crops, identify type of crop (e.g., corn, potatoes):

|             |                              |                                                                                                                                                                                                                                                                                                                                                                |
|-------------|------------------------------|----------------------------------------------------------------------------------------------------------------------------------------------------------------------------------------------------------------------------------------------------------------------------------------------------------------------------------------------------------------|
| <b>EF</b>   | Evergreen Forest             | Areas dominated by trees generally >5 meters tall, and >20% of total vegetation cover. More than 75% of the tree species maintain their leaves all year. Canopy is never without green foliage.                                                                                                                                                                |
| <b>EHW</b>  | Emergent Herbaceous Wetlands | Areas where perennial herbaceous vegetation accounts >80% of vegetative cover and the soil or substrate is periodically saturated with or covered with water.                                                                                                                                                                                                  |
| <b>G</b>    | Garden                       | Garden                                                                                                                                                                                                                                                                                                                                                         |
| <b>G/H</b>  | Grassland/Herbaceous         | Areas dominated by graminoid or herbaceous vegetation, generally >80% of total vegetation. Area not subject to intensive management such as tilling, but can be utilized for grazing.                                                                                                                                                                          |
| <b>MF</b>   | Mixed Forest                 | Areas dominated by trees generally >5 meters tall, and >20% of total vegetation cover. Neither deciduous nor evergreen species are >75% of total tree cover.                                                                                                                                                                                                   |
| <b>P-OS</b> | Park-Open Space              | Areas with a mixture of some constructed materials, but mostly vegetation in the form of lawn grasses. Impervious surfaces account for <20% of total cover. These areas most commonly include large-lot single-family housing units, parks, golf courses, and vegetation planted in developed settings for recreation, erosion control, or aesthetic purposes. |
| <b>P/H</b>  | Pasture/Hay                  | Areas of grasses, legumes, or grass-legume mixtures planted for livestock grazing or the production of seed or hay crops, typically on a perennial cycle. Pasture/hay vegetation accounts for >20% of total vegetation.                                                                                                                                        |
| <b>S/S</b>  | Shrub/Scrub                  | Areas dominated by shrubs; <5 meters tall with shrub canopy typically >20% of total vegetation. This class includes true shrubs, young trees in an early successional stage or trees stunted from environmental conditions.                                                                                                                                    |
| <b>WW</b>   | Woody Wetlands               | Areas where forest or shrubland vegetation accounts for >20% of vegetative cover and the soil or substrate is periodically saturated with or covered with water.                                                                                                                                                                                               |
| <b>D-HI</b> | Developed-High Intensity     | Highly developed areas where people reside or work in high numbers. Examples include apartment complexes, row houses and commercial/industrial. Impervious surfaces account for 80% to 100% of the total cover.                                                                                                                                                |
| <b>D-MI</b> | Developed-Medium Intensity   | Areas with a mixture of constructed materials and vegetation. Impervious surfaces account for 50% to 79% of the total cover. These areas most commonly include single-family housing units.                                                                                                                                                                    |
| <b>D-LI</b> | Developed-Low Intensity      | Areas with a mixture of constructed materials and vegetation. Impervious surfaces account for 20% to 49% percent of total cover. Areas most commonly include single-family housing units.                                                                                                                                                                      |
| <b>ID</b>   | Irrigation ditch             | Area associated with irrigation canal including access roads.                                                                                                                                                                                                                                                                                                  |

**Habitat association:** Habitat parameters that describe the milkweed stand location. Multi-select if appropriate (separate by commas in field data sheet):

| Code | Habitat association          | Definition                                                                                                                                              |
|------|------------------------------|---------------------------------------------------------------------------------------------------------------------------------------------------------|
| EH   | Edge Habitat                 | Milkweed plants occur within a 5 meter transition zone between 2 habitat types                                                                          |
| FH   | Floodplain Habitat           | Milkweed plants occur along shorelines of a waterbody or within the natural floodplain of a river or stream                                             |
| FR   | Fence Row                    | Milkweed occurs predominantly along a fenceline, usually in a linear fashion, and excluded from expansion by management actions or other features       |
| GP   | Garden-Park                  |                                                                                                                                                         |
| R    | Roadside                     | Milkweed plants occur within a roadside right-of-way, usually in a linear fashion, and excluded from expansion by impervious surfaces or other features |
| PUC  | Public Utility Corridors     | Any rights-of-way or facilities managed by a utility company; e.g., under transmission lines, pipelines                                                 |
| IC   | Irrigation Canals            | Open artificial water conveyance systems generally associated with agricultural                                                                         |
| IAF  | Irrigated Agriculture Fields | Fields or crops irrigated for agricultural purposes, usually with sprinkler systems or watered through crop rows                                        |
| NA   | None of the Above            | Milkweed plants do not occur in any of the above scenarios                                                                                              |

**Management actions:** Known land management or other actions that occur on the site that may affect (positively or negatively) milkweed plants. Multi-select if appropriate (separate by commas in data collection sheet):

| Code | Management actions                | Definitions                                                                                                                  |
|------|-----------------------------------|------------------------------------------------------------------------------------------------------------------------------|
| G    | Grazing                           | Livestock grazing occurs at least once every 3 years                                                                         |
| IM   | Intense Mowing                    | Mowing occurs annually or more frequently                                                                                    |
| LM   | Light Mowing                      | Mowing occurs, but with at least 1 year of rest between each mowing                                                          |
| H    | Haying                            | Haying occurs at least once every 3 years                                                                                    |
| IH   | Intense Haying                    | Haying occurs annually or more frequently                                                                                    |
| PB   | Prescribed Burning                | Prescribed burning occurs at least once every 3 years                                                                        |
| FHA  | Frequent Herbicide Applications   | Herbicide applications occur annually or more frequently; may or may not target milkweed                                     |
| IHA  | Infrequent Herbicide Applications | Herbicide applications occur every 2 years or less; may or may not target milkweed                                           |
| IA   | Insecticide Applications          | Insecticide applications occur at once every 3 years or more frequently                                                      |
| TH   | Timber Harvest                    | Milkweed plants occur in a designated timber harvest area                                                                    |
| BC   | Brush Clearing                    | Understory vegetation is cleared at least once every 3 years for fire suppression or other reasons                           |
| RG   | Road Grading                      | Roads and/or road ditches are graded at least once every 3 years                                                             |
| SW   | Supplemental Watering             | Milkweed plants receive supplemental water directly as part of landscape or nursery operations                               |
| IW   | Indirect Watering                 | Milkweed plants receive supplemental water from agricultural runoff, sprinkler systems, roadside ditches, agricultural ponds |
| IDM  | Irrigation Ditch Maintenance      | Ditch maintenance occurs once every 3 years or less                                                                          |
| UNK  | Unknown                           | Land management actions are unknown or undiscernible                                                                         |

**Threats:** Known or potential issues that may threaten the persistence of a milkweed population. Surveyors are encouraged to identify threats that may not be listed below (e.g., military training, wildfire, etc.). Multi-select if appropriate:

| Code       | Threats                      | Definitions                                                                           |
|------------|------------------------------|---------------------------------------------------------------------------------------|
| <b>M</b>   | Mowing                       | Repeated seasonal mowing or mowing during monarch breeding season                     |
| <b>H</b>   | Haying                       | Repeated seasonal haying or haying during the monarch breeding season                 |
| <b>HA</b>  | Herbicide Application        | Application directly on milkweed or close proximity (<50')                            |
| <b>IA</b>  | Insecticide Application      | Application directly on milkweed or in close proximity (<50')                         |
| <b>G</b>   | Grazing                      | Excessive grazing that causes trampling of plants                                     |
| <b>FR</b>  | Flooding Regimes             | Natural floodplain function lost due to dams or other management actions              |
| <b>VE</b>  | Vegetation Encroachment      | Lack of fire and other natural disturbance regimes that promote vegetation succession |
| <b>IS</b>  | Invasive Species             | Presence of invasive grass or shrub species that suppress milkweed growth             |
| <b>RD</b>  | Recreational Disturbance     | Site subject to off-road vehicle use, foot traffic that can impact plant growth       |
| <b>IDM</b> | Irrigation Ditch Maintenance | Removal/eradication of milkweed plants within irrigation ditch profiles.              |
| <b>D</b>   | Development                  | Removal/eradication of milkweed plants from residential/business land development.    |

**Milkweed adjacent:** Note whether milkweed is contiguous to adjacent grid cells. Choose Y or N for each adjacent cell. Where milkweed is present in an adjacent cell, include milkweed structure code (e.g., S, C, L).

**Survey notes:** Describe survey, site access, document photos, or any other pertinent observations. Note locations of any federally listed plant and animal species observed during the survey.

## **MONARCH DATA**

**Female monarch count:** Number of adult female monarchs observed at the site

**Male monarch count:** Number of male monarchs observed at the site

**Total monarch count:** Total number of adult monarchs observed

**Behavior notes:** Observed behavior of adult monarchs at site (multi-select if appropriate, separate by commas)

| Code | Behavior notes    | Definition                                                                                                                            |
|------|-------------------|---------------------------------------------------------------------------------------------------------------------------------------|
| FM   | Flying (Migrant)  | Subjective - monarch flying out of or over the site in a relatively straight direction and altitude that indicates migratory behavior |
| FF   | Flying (Foraging) | Subjective - monarch flying near ground-level, flight path non-directional                                                            |
| L/P  | Loafing/Perched   | Monarch perched on a non-flowering plant or other object during daytime                                                               |
| NR   | Night Roosting    | Monarch perched in a tree, shrub, or other sheltered site just prior to sunset                                                        |
| N    | Nectaring         | Monarch actively nectaring from a flower                                                                                              |
| M    | Mating            | Male and female monarchs clasped together                                                                                             |
| EL   | Egg Laying        | Female monarch actively laying eggs                                                                                                   |
| E    | Eclosing          | Butterfly is emerging from pupal case                                                                                                 |
| O    | Other             | None of the above behavior                                                                                                            |
| NO   | None Observed     | None observed                                                                                                                         |

**Egg count:** Number of monarch eggs observed

**Larvae count:** Number of monarch larvae observed; quantify instar stage (1<sup>st</sup> – 5<sup>th</sup>)

**Pupae count:** Number of monarch pupae observed

**Pupae substrate:** Plant species pupae were attached to (by scientific name or take sample)

**Nectar species used:** Enter the genus and/or species of nectar plants monarchs are using. If unknown, photograph the plant/flower and identify later.

**Other pollinators observed:** Enter genus and/or species of other pollinator species observed during survey. Consult pollinator I.D. sheet and take photographs for positive identifications.

**Monarchs adjacent:** Note whether adult monarchs are observed in adjacent cells. For instance, if an adult monarch is observed in the cell NW of the surveyed cell, enter Y-NW and provide count and behavior code(s). If none are observed in adjacent cells, enter N.
